# Supplementary material
Source: ML conference proceedings conference paper supplement (https://openaccess.thecvf.com/content/CVPRW_2020/html/Low_SOFEA_A_Non-Iterative_CVPRW_2020_paper.html)
Supplement: Supplementary file 1 [file Low_SOFEA_A_Non-Iterative_CVPRW_2020_supplemental.pdf]

# Supplementary Material – SOFEA: A Non-iterative and Robust Optical Flow Estimation Algorithm for Dynamic Vision Sensors

Weng Fei Low, Zhi Gao, Cheng Xiang, and Bharath Ramesh\*

The N.1 Institute for Health, National University of Singapore

Email: bharath.ramesh03@u.nus.edu

## 1. Proof of Local Optimality of $\overline{\mathcal{N}}$

In Section 4.2 of the main text, we have claimed that the proposed greedy heuristic yields a set of neighboring events  $\overline{\mathcal{N}}$  that is locally optimal with respect to the criteria laid down for  $\mathcal{N}^*$ . Thus, we will deliver a mathematical proof of the local optimality of  $\overline{\mathcal{N}}$  in this section.

**Definition 1.1.**  $\mathcal{N}_n^*$  is a set of neighboring events of size  $n \in \mathbb{N}$  that is optimal with respect to Criterion 1 to 6. The set of all possible  $\mathcal{N}_n^*$  is denoted by  $\{\mathcal{N}_n^*\}$ .

**Definition 1.2.**  $\widehat{\mathcal{N}}_n$  is a set of neighboring events of size  $n \in \mathbb{N}$  that is optimal with respect to Criterion 1 to 5. The set of all possible  $\mathcal{N}_n^*$  is denoted by  $\{\widehat{\mathcal{N}}_n\}$ .

**Definition 1.3.**  $\overline{\mathcal{N}}_n$  is the set of neighboring events of size  $n \in \mathbb{N}$  that is given by the greedy heuristic.

**Definition 1.4.**  $t_{\min}(\mathcal{N})$  is a function that gives the minimum timestamp of events in the set of neighboring events  $\mathcal{N}$  (i.e.  $t_{\min}(\mathcal{N}) = \min \{t \mid e = (x, y, t, p) \in \mathcal{N}\}$ ).

**Lemma 1.1** (Monotonicity Lemma). *The minimum timestamp of events in  $\widehat{\mathcal{N}}$  of size  $n + 1$  is no larger than the minimum timestamp of events in  $\widehat{\mathcal{N}}$  of size  $n$ . Simply speaking,  $t_{\min}(\widehat{\mathcal{N}}_{n+1}) \leq t_{\min}(\widehat{\mathcal{N}}_n)$ .*

*Proof.*

- 1: Suppose  $t_{\min}(\widehat{\mathcal{N}}_{n+1}) > t_{\min}(\widehat{\mathcal{N}}_n)$ :
- 2: By removing any one of the events in  $\widehat{\mathcal{N}}_{n+1}$  in such a way that Criterion 4 is not violated, we are able to obtain a new set of neighboring events  $\mathcal{N}_n$  such that  $t_{\min}(\mathcal{N}_n) \geq t_{\min}(\widehat{\mathcal{N}}_{n+1})$ .
- 3: Combining the above with the assumption,  $t_{\min}(\mathcal{N}_n) > t_{\min}(\widehat{\mathcal{N}}_n)$  is implied.
- 4: With that, there is a contradiction in the fact that  $\widehat{\mathcal{N}}_n$  is optimal with respect to Criterion 1 to 5 (Definition 1.2), as  $\mathcal{N}_n$  clearly provides a better solution in terms of Criterion 5.
- 5: Thus,  $t_{\min}(\widehat{\mathcal{N}}_{n+1}) \leq t_{\min}(\widehat{\mathcal{N}}_n)$ . ■

**Definition 1.5.**  $\mathcal{C}^n$  is the set of candidate neighboring events  $\mathcal{C}$  given by Algorithm 1 at (the end of) iteration  $n \in \mathbb{N}$  of the while loop. It is equivalent to the set of 8-neighbors of all events in  $\overline{\mathcal{N}}_n$ .  $\mathcal{C}^0$  is defined to be the initialized value of  $\mathcal{C}$  in Algorithm 1 (i.e.  $\mathcal{C}^0 = \{e \mid e \text{ is an 8-neighbor of } e_{EOI} \text{ with the same polarity}\}$ ).

**Definition 1.6.**  $e_{new}^n = (x_{new}^n, y_{new}^n, t_{new}^n, p_{new}^n)$  is the newly selected neighboring event given by Algorithm 1 at (the end of) iteration  $n \in \mathbb{N}$  of the while loop.

**Theorem 1.2.**  $\overline{\mathcal{N}}_n$  is optimal with respect to Criterion 1 to 5 (i.e.  $\overline{\mathcal{N}}_n \in \{\widehat{\mathcal{N}}_n\}$ )

*Proof.*

- 1: From the greedy heuristic, it is trivial that  $\overline{\mathcal{N}}_n$  satisfies Criterion 1 to 4.
- 2: Without loss of generality, we will make use of Algorithm 1, which provides an efficient implementation of the greedy heuristic, instead to prove that  $\overline{\mathcal{N}}_n$  satisfies Criterion 5 too by Mathematical Induction.
- 3: **Base Case:**  $k = 1$
- 4: Due to the constraints of Criterion 1 to 4,  $\widehat{\mathcal{N}}_1 \subset \mathcal{C}^0$ .
- 5: Along with the constraint of Criterion 5,  $\widehat{\mathcal{N}}_1 = \{e \mid e \in \mathcal{C}^0 \text{ with the largest timestamp}\}$ .
- 6: As  $e_{new}^1$  is clearly  $e \in \mathcal{C}^0$  with the largest timestamp, we can conclude that  $\overline{\mathcal{N}}_1 = \{e_{new}^1\} \in \{\widehat{\mathcal{N}}_1\}$ .
- 7: **Inductive Step:**  $\forall k \in \mathbb{N}$
- 8: Assume that  $\overline{\mathcal{N}}_k \in \{\widehat{\mathcal{N}}_k\}$ :
- 9: The above assumption implies  $t_{\min}(\overline{\mathcal{N}}_k) = t_{\min}(\widehat{\mathcal{N}}_k)$ .
- 10: We now consider the case of  $\overline{\mathcal{N}}_{k+1}$ .
- 11: **Case 1:**  $t_{new}^{k+1} \geq t_{\min}(\overline{\mathcal{N}}_k)$
- 12: In this particular case, the condition of  $t_{\min}(\overline{\mathcal{N}}_{k+1}) = t_{\min}(\overline{\mathcal{N}}_k)$ , which also equals to  $t_{\min}(\widehat{\mathcal{N}}_k)$  (Line 9), must hold.
- 13: Since  $t_{\min}(\widehat{\mathcal{N}}_{k+1}) \leq t_{\min}(\widehat{\mathcal{N}}_k)$  (Lemma 1.1: Monotonicity Lemma), the best case scenario for  $\widehat{\mathcal{N}}_{k+1}$  in terms of Criterion 5 is that  $t_{\min}(\widehat{\mathcal{N}}_{k+1}) = t_{\min}(\widehat{\mathcal{N}}_k)$ .

14: This implies that  $\overline{\mathcal{N}}_{k+1} \in \{ \widehat{\mathcal{N}}_{k+1} \}$ , as  $\overline{\mathcal{N}}_{k+1}$  achieves the best case scenario for  $\widehat{\mathcal{N}}_{k+1}$  in terms of Criterion 5.

15: **Case 2:**  $t_{new}^{k+1} < t_{min}(\overline{\mathcal{N}}_k)$

16: Suppose  $\overline{\mathcal{N}}_{k+1} \notin \{ \widehat{\mathcal{N}}_{k+1} \}$ :

17: As  $\overline{\mathcal{N}}_{k+1}$  must satisfy Criterion 1 to 4, this implies that Criterion 5 is violated and hence  $t_{min}(\overline{\mathcal{N}}_{k+1}) < t_{min}(\widehat{\mathcal{N}}_{k+1})$ .

18: With  $t_{new}^{k+1} < t_{min}(\overline{\mathcal{N}}_k)$  in this particular case,  $t_{min}(\overline{\mathcal{N}}_{k+1}) = t_{new}^{k+1}$  must be true.

19: This implies that  $t_{new}^{k+1} < t_{min}(\widehat{\mathcal{N}}_{k+1})$  and hence  $e_{new}^{k+1} \notin \widehat{\mathcal{N}}_{k+1}$ .

20: A new set of neighboring events  $\mathcal{N}_{k+1}$  can be obtained by removing a set of events  $\mathcal{R}_l$  of size  $l \in \{ 0, 1, \dots, k \}$  from  $\overline{\mathcal{N}}_k$  and adding in another disjoint set of events  $\mathcal{A}_{l+1}$  of size  $l + 1$  (i.e.  $\mathcal{N}_{k+1} = (\overline{\mathcal{N}}_k \setminus \mathcal{R}_l) \cup \mathcal{A}_{l+1}$ , where  $\mathcal{R}_l \subset \overline{\mathcal{N}}_k$  and  $\mathcal{R}_l \cap \mathcal{A}_{l+1} = \emptyset$ ), in such a way that Criterion 1 to 4 are satisfied.

21: By exhaustively searching for all possible  $\mathcal{N}_{k+1}$ ,  $\widehat{\mathcal{N}}_{k+1}$  can then be found.

22: As  $\mathcal{C}^k$  is the set of 8-neighbors of all  $k$  events in  $\overline{\mathcal{N}}_k$  and  $\mathcal{N}_{k+1}$  is of size  $k + 1$ , at least one of the events in  $\mathcal{A}_{l+1}$  must be an event in  $\mathcal{C}^k$ .

23: Because  $t_{new}^{k+1} < t_{min}(\widehat{\mathcal{N}}_k)$  (given by the condition of Case 2 and Line 9) and  $e_{new}^{k+1}$  has the largest timestamp in  $\mathcal{C}^k$ ,  $e_{new}^{k+1}$  must be in all possible  $\mathcal{N}_{k+1}$  that yields  $\widehat{\mathcal{N}}_{k+1}$  (Criterion 5).

24: With that, it contradicts with the assumption that  $e_{new}^{k+1} \notin \widehat{\mathcal{N}}_{k+1}$ .

25: Therefore,  $\overline{\mathcal{N}}_{k+1} \in \{ \widehat{\mathcal{N}}_{k+1} \}$  is true.

26: As proven in both cases, we conclude that  $\overline{\mathcal{N}}_{k+1} \in \{ \widehat{\mathcal{N}}_{k+1} \}$ .

27: By Mathematical Induction, the statement is true. ■

**Definition 1.7.**  $\widehat{\mathcal{C}}^n$  is the subset of events in  $\mathcal{C}^n$  with timestamps larger than  $t_{min}(\overline{\mathcal{N}}_n)$ . Mathematically,  $\widehat{\mathcal{C}}^n = \{ e \mid t > t_{min}(\overline{\mathcal{N}}_n), e = (x, y, t, p) \in \mathcal{C}^n \}$ .

**Corollary 1.2.1.**  $\overline{\mathcal{N}}_n$  is locally optimal with respect to Criterion 1 to 6. Specifically,  $\overline{\mathcal{N}}_n$  is optimal with respect to Criterion 6 (i.e.  $\overline{\mathcal{N}}_n \in \{ \mathcal{N}_n^* \}$ ) in the following scenarios:

- $\widehat{\mathcal{C}}^n = \emptyset$  (i.e.  $t_{min}(\mathcal{C}^n) \leq t_{min}(\overline{\mathcal{N}}_n) = t_{min}(\widehat{\mathcal{N}}_n)$ ), hence the sum of timestamps cannot be further maximized, while still complying with Criterion 5. This also implies a unique  $\widehat{\mathcal{N}}_n$  and hence  $\mathcal{N}_n^*$ , given that no two events have the same timestamp.
- $\widehat{\mathcal{C}}^n \neq \emptyset$  (i.e.  $t_{min}(\mathcal{C}^n) > t_{min}(\overline{\mathcal{N}}_n) = t_{min}(\widehat{\mathcal{N}}_n)$ ), but none of the events in  $\overline{\mathcal{N}}_n$  can be removed to accommodate for events in  $\widehat{\mathcal{C}}^n$ , so that the sum of timestamps is further maximized, while still complying with Criterion 4.

In other words, the two scenarios imply that  $\overline{\mathcal{N}}_n$  is optimal with respect to Criterion 6 when  $\mathcal{N}_n^*$  is as “spatially compact” as  $\overline{\mathcal{N}}_n$ , with respect to the EOI.
